# Supplementary material
Source: PubMed Central journal article supplement (PMC6830783)
Supplement: ASN.2019040385SupplementaryData.pdf [file ASN.2019040385SupplementaryData.pdf]

## **Serious Illness Treatment Preferences for Older Adults with Advanced CKD**

### **Supplementary Tables & Figures**

## Table of Contents:

- **Supplemental Table 1.** Serious Illness Treatment Preference and First Choice Health Outcome Priority
- **Supplemental Table 2.** Patient willingness to share serious illness preference with provider and medical chart
- **Supplemental Table 3.** Odds of a Serious Illness Treatment Preference choice favoring less aggressive care
  
- **Supplemental Figure 1.** Visual assessment of association between patients' Serious Illness Treatment Preference and first Health Outcome Priority
- **Supplemental Figure 2.** Patients' willingness to share Serious Illness Treatment Preference

**Supplemental Table 1.** Serious Illness Treatment Preference and First Choice Health Outcome Priority\*

|                                               | Patients' Serious Illness Treatment Preference |                                       |                                                |                                |
|-----------------------------------------------|------------------------------------------------|---------------------------------------|------------------------------------------------|--------------------------------|
|                                               | Combined<br>(N=321)                            | Live as long as<br>possible<br>(N=70) | Try<br>treatments, do<br>not suffer<br>(N=129) | Focus on<br>comfort<br>(N=122) |
| <b>1<sup>st</sup> Health Outcome Priority</b> |                                                |                                       |                                                |                                |
| Staying alive                                 | 34 (109)                                       | 56 (39)                               | 35 (45)                                        | 20 (25)                        |
| Maintaining independence                      | 49 (157)                                       | 34 (24)                               | 51 (66)                                        | 55 (67)                        |
| Reducing pain                                 | 11 (34)                                        | 4 (3)                                 | 8 (10)                                         | 17 (21)                        |
| Reducing symptoms                             | 7 (21)                                         | 6 (4)                                 | 6 (8)                                          | 7 (9)                          |

Results are presented as % and (N).

\*N = 321 due to exclusion of 47 participants who were unsure of their serious illness treatment preference and 14 who were unsure of their health outcome priorities.

Chi-square association of health outcome priority and serious illness treatment preference:  $P < 0.001$

**Supplemental Table 2.** Patient willingness to share serious illness preference with provider and medical chart

|                  | Combined<br>(N=220) | Live as long as<br>possible<br>(N=44) | Try treatments, do<br>not suffer<br>(N=85) | Focus on<br>comfort<br>(N=91) |
|------------------|---------------------|---------------------------------------|--------------------------------------------|-------------------------------|
| Willing to share |                     |                                       |                                            |                               |
| Yes              | 91 (200)            | 84 (37)                               | 91 (77)                                    | 95 (86)                       |
| No               | 9 (20)              | 16 (7)                                | 9 (8)                                      | 5 (5)                         |

\*P=0.14, test of association between serious illness treatment preference and willingness to share. P value calculated using chi-squared test.

**Supplemental Table 3.** Odds of a Serious Illness Treatment Preference choice favoring less aggressive care

|                                                | <b>Odds Ratio (95% CI)</b> |
|------------------------------------------------|----------------------------|
| Age (77 years vs. 66 years)                    | 1.09 (0.72, 1.64)          |
| Female: Male                                   | 1.09 (0.66, 1.80)          |
| Black: Not Black                               | 0.66 (0.34, 1.28)          |
| Divorced: Married                              | 0.97 (0.45, 2.08)          |
| <b>Widow/Widower: Married</b>                  | <b>1.94 (1.02, 3.68)</b>   |
| Other: Married                                 | 0.79 (0.28, 2.26)          |
| <b>Some HS: HS diploma or equivalent</b>       | <b>0.44 (0.20, 0.99)</b>   |
| Some college: HS diploma or equivalent         | 0.60 (0.31, 1.15)          |
| Undergraduate degree: HS diploma or equivalent | 0.73 (0.38, 1.43)          |
| Graduate degree: HS diploma or equivalent      | 0.93 (0.45, 1.89)          |
| <b>Income (\$90K: \$30K)</b>                   | <b>2.32 (1.32, 4.09)</b>   |
| <b>Private: Medicare</b>                       | <b>0.54 (0.31, 0.94)</b>   |
| Other: Medicare                                | 0.45 (0.13, 1.56)          |
| Diabetes                                       | 1.35 (0.85, 2.14)          |
| Coronary artery disease                        | 0.64 (0.37, 1.09)          |
| Peripheral vascular disease                    | 0.68 (0.32, 1.44)          |
| <b>Cerebrovascular disease</b>                 | <b>2.48 (1.30, 4.73)</b>   |
| Heart failure                                  | 0.97 (0.54, 1.75)          |
| Chronic lung disease                           | 0.75 (0.41, 1.36)          |
| eGFR, (MDRD)**                                 | 0.99 (0.72, 1.36)          |
| POSS-Renal                                     | 1.14 (0.72, 1.79)          |

Odds ratios are obtained for the difference between 25th and 75th percentile in continuous variables and for each level against the reference of categorical variables. Odds ratio refer to increased odds to prefer less aggressive care (i.e., “Live as long as possible” ordered as 0, “Try treatments, but do not suffer” ordered as 1, and “Focus on comfort” ordered as 2).

POS-S Renal, Palliative Care Outcome Scale-Symptoms Renal. eGFR, estimated glomerular filtration rate. BMI, body mass index. CAD, coronary artery disease. CVD, cerebrovascular disease. PVD, peripheral vascular disease. MDRD, Modification of Diet in Renal Disease. HS, high school.

\*\*in ml/min/1.73m<sup>2</sup>

**Supplemental Figure 1.** Visual assessment of association between patients’ Serious Illness Treatment Preference and first Health Outcome Priority\*

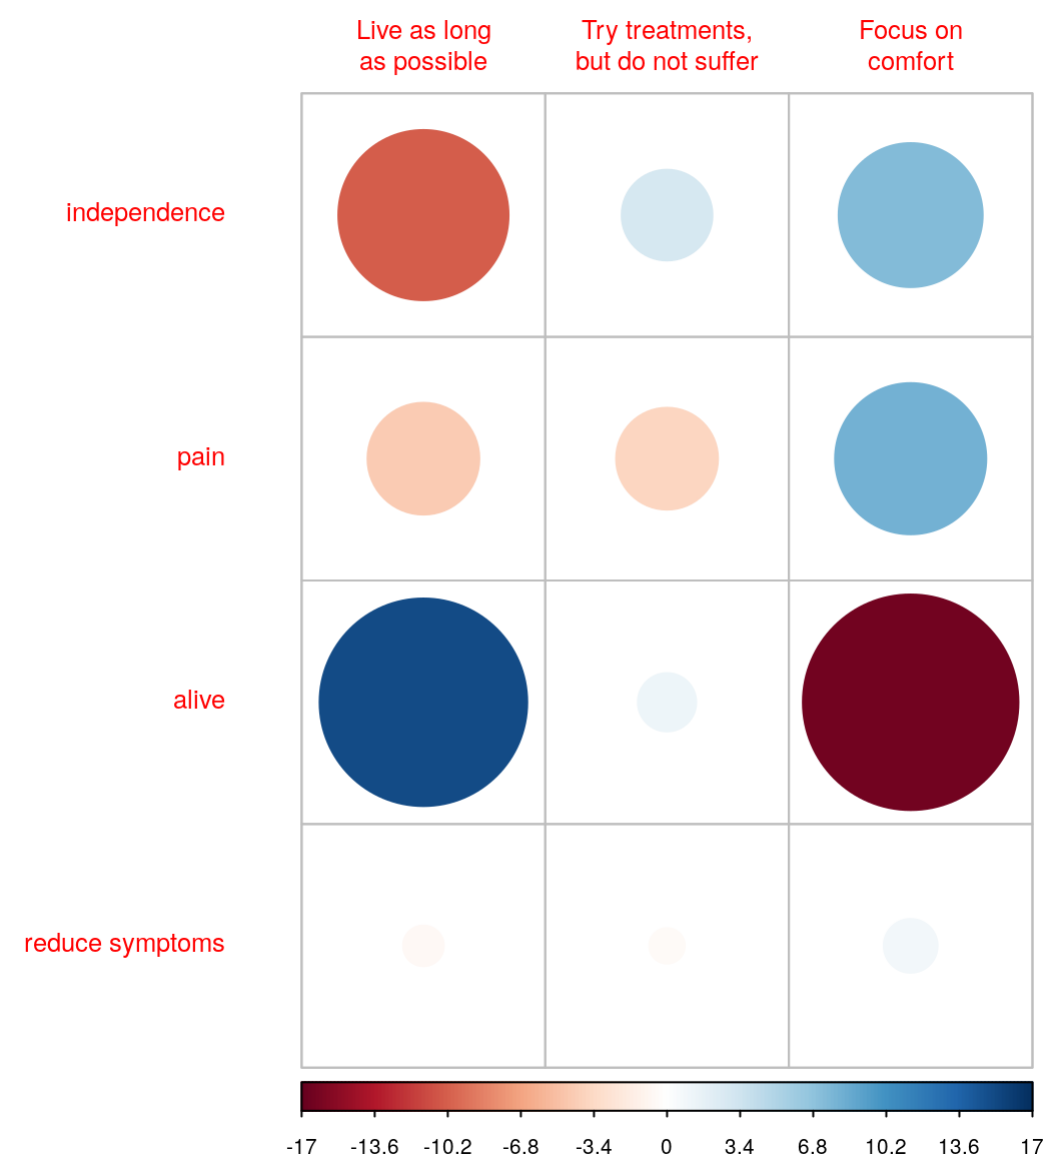

The size and color intensity each signify the degree of association. The color signifies whether the two responses were positively (blue) or negatively (red) correlated.

**Supplemental Figure 2.** Patients’ willingness to share Serious Illness Treatment Preference\*

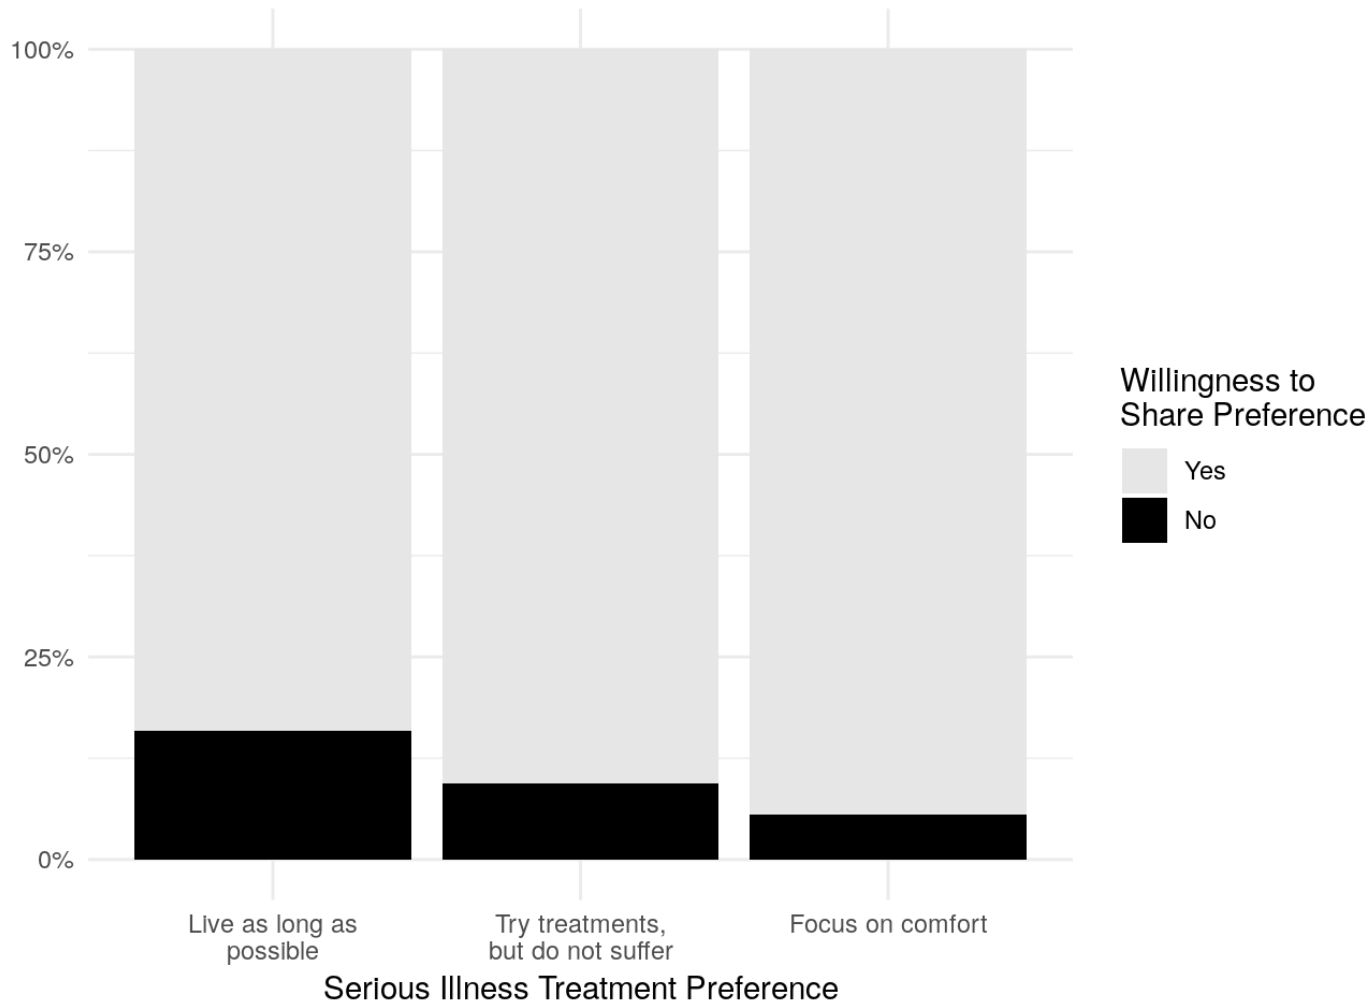

\*Chi-square P=0.14
